# Supplementary material for: Electrical properties of amorphous Zn–Sn–O thin films depending on composition and post-deposition annealing temperature near crystallization temperature
Source: Royal Society of Chemistry journal article supplement (doi:10.1039/d2tc05090k), 2023-01-01
Supplement: d2tc05090k1.pdf [file d2tc05090k1.pdf]

Electronic Supplementary Material (ESI) for Journal of Materials Chemistry C.  
This journal is © The Royal Society of Chemistry 2022

# Supporting Information

## **Electrical properties of amorphous Zn-Sn-O thin films depending on composition and post-deposition annealing temperature near crystallization temperature**

*Whayoung kim<sup>a,b</sup>, Sukin Kang<sup>a</sup>, Yonghee Lee<sup>a</sup>, Sahngik Mun<sup>a</sup>, Jinheon Choi<sup>a</sup>, Sunjin Lee<sup>a,b</sup>, and  
Cheol Seong Hwang<sup>a,\*</sup>*

<sup>a</sup>Department of Materials Science and Engineering and Inter-University Semiconductor  
Research Center, Seoul National University, Seoul, 08826, South Korea

*\*E-mail: cheolsh@snu.ac.kr*

<sup>b</sup>SK Hynix Semiconductor, Inc., Icheon, Gyeonggi 17336, Republic of Korea

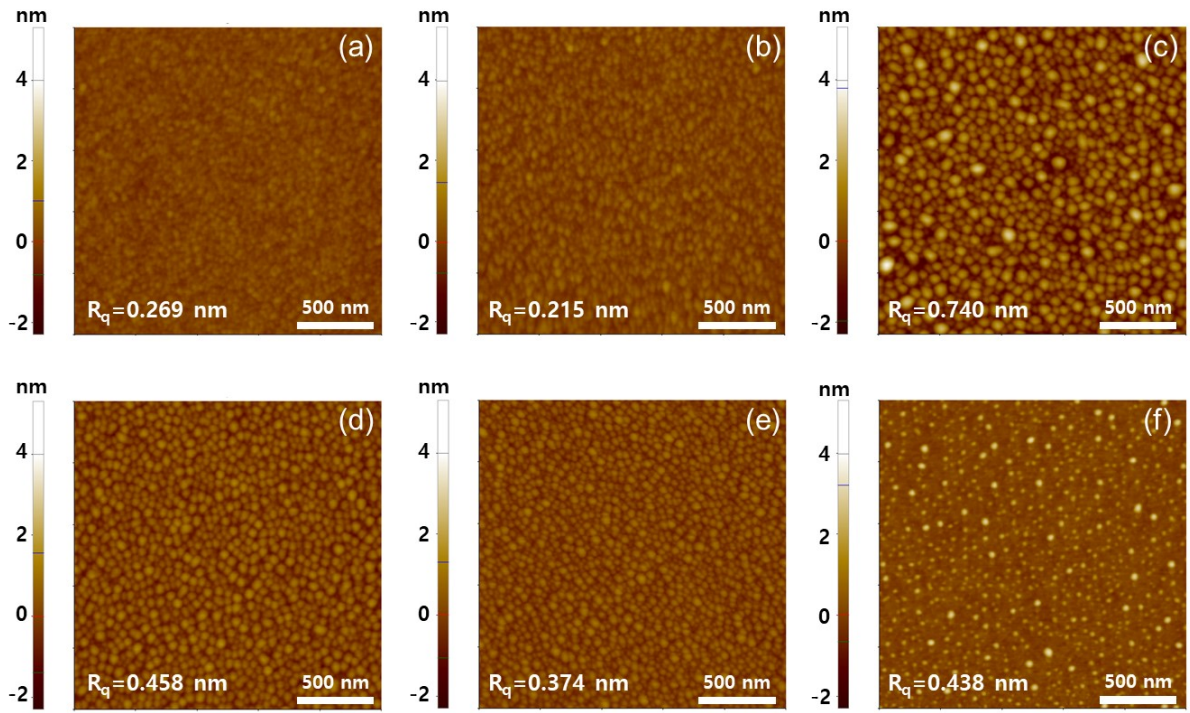

**Figure S1.** AFM images and root-mean-square roughness ( $R_q$ ) value of ZTO thin films with (a) Sn 16 at%, (b) Sn 26 at%, (c) Sn 42 at%, (d) Sn 53 at%, (e) Sn 66 at%, (f) 76 at%

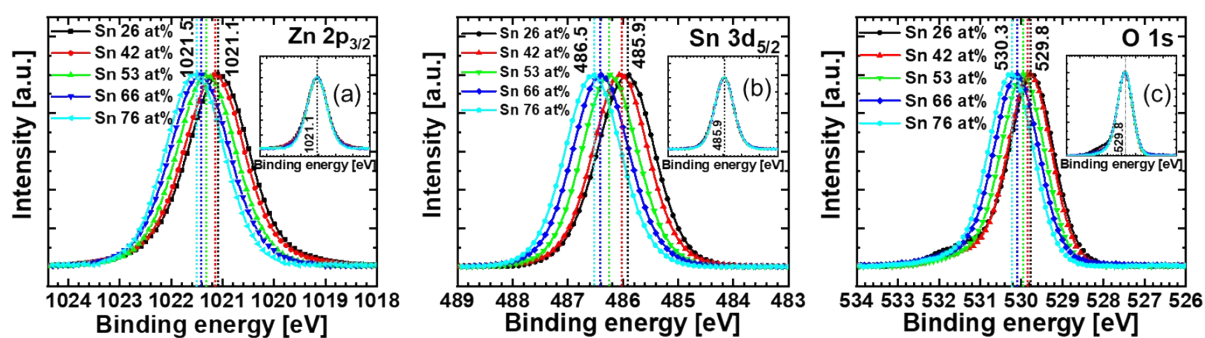

**Figure S2.** XPS spectra of (a) Zn 2p<sub>3/2</sub>, (b) Sn 3d<sub>5/2</sub>, (c) O 1s orbital of the ZTO films with Sn 26 ~ 76 at%. The inset in each panel shows the parallelly aligned peaks of each orbital.

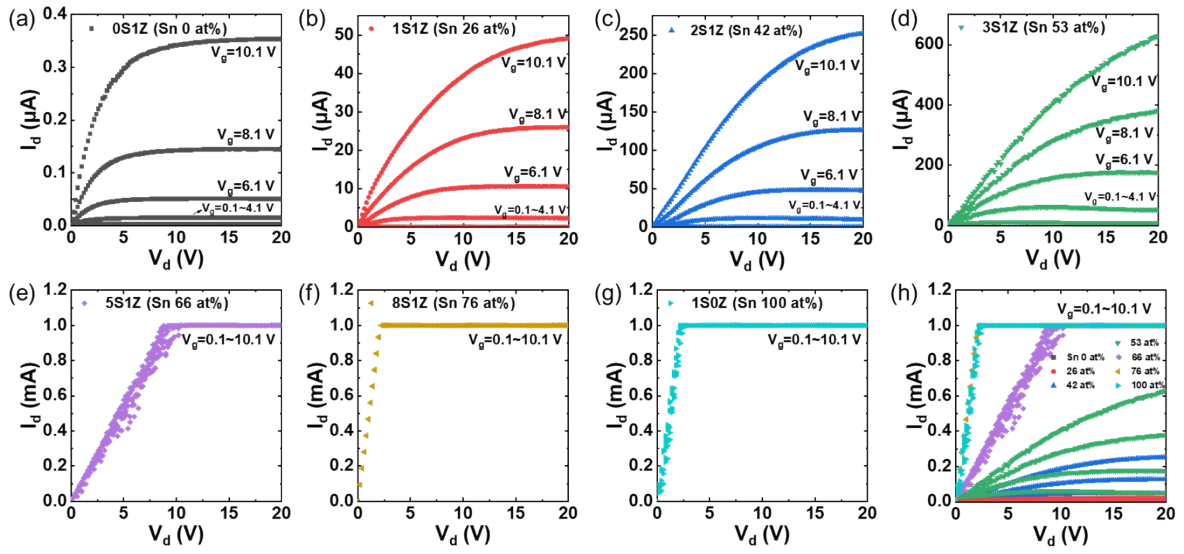

**Figure S3.** Output curves of ZTO thin films with (a) Sn 0 at% (b) Sn 26 at%, (c) Sn 42 at%, (d) Sn 53 at%, (e) Sn 66 at%, (f) 76 at%, (g) 100 at%, (h) summary of all

**Table S1.** Electrical parameters of the subgap density of state used in technology computer-aided design(TCAD) for Sn 42at% ZTO TFT.

| Parameter                              | Sn 42at% ZTO          | Description                                                                          |
|----------------------------------------|-----------------------|--------------------------------------------------------------------------------------|
| $E_g$ (eV)                             | 3.2                   | Bandgap energy                                                                       |
| NTA ( $\text{cm}^{-3}\text{eV}^{-1}$ ) | $1.8 \times 10^{20}$  | Density of acceptor-like states in the tail distribution at the conduction band edge |
| NTD ( $\text{cm}^{-3}\text{eV}^{-1}$ ) | $1.55 \times 10^{20}$ | Density of donor-like states in the tail distribution at the valence band edge       |
| WTA (eV)                               | 0.028                 | Characteristic decay energy for the tail distribution of acceptor-like states        |
| WTD (eV)                               | 0.11                  | Characteristic decay energy for the tail distribution of donor-like states           |
| NGA ( $\text{cm}^{-3}\text{eV}^{-1}$ ) | $1.2 \times 10^{17}$  | Total density of acceptor-like states in a Gaussian distribution                     |
| NGD ( $\text{cm}^{-3}\text{eV}^{-1}$ ) | $8 \times 10^{17}$    | Total density of donor-like states in a Gaussian distribution                        |
| WGA (eV)                               | 0.1                   | Characteristic decay energy for a Gaussian distribution of acceptor-like states      |
| WGD (eV)                               | 0.08                  | Characteristic decay energy for a Gaussian distribution of donor-like states         |
| EGA (eV)                               | 2.0                   | Energy that corresponds to the Gaussian distribution peak for acceptor-like states   |
| EGD (eV)                               | 2.95                  | Energy that corresponds to the Gaussian distribution peak for donor-like states      |

**Table S2.** Functions and formulas used to distribute the density of states in TCAD simulation

| function    | formula                                         | Description                                          |
|-------------|-------------------------------------------------|------------------------------------------------------|
| $g(E)$      | $g_{TA}(E)+g_{TD}(E)+g_{GA}(E)+g_{GD}(E)$       | Total density of states of the material              |
| $g_{TA}(E)$ | $NTA \times \exp(\frac{E-E_c}{W_{TA}})$         | Density of acceptor-like tail states                 |
| $g_{TD}(E)$ | $NTD \times \exp(\frac{E_v-E}{W_{TD}})$         | Density of donor-like tail states                    |
| $g_{GA}(E)$ | $NGA \times \exp(-[\frac{E_{GA}-E}{W_{GA}}]^2)$ | Density of gaussian-distributed acceptor-like states |
| $g_{GD}(E)$ | $NGD \times \exp(-[\frac{E-E_{GD}}{W_{GD}}]^2)$ | Density of gaussian-distributed donor-like states    |
